# Supplementary material for: A review on the traditional uses, nutritive importance, pharmacognostic features, phytochemicals, and pharmacology of Momordica cymbalaria Hook F
Source: PeerJ journal article supplement (doi:10.7717/peerj.16928), 2024-02-27
Supplement: Supplementary_file.pdf [file Supplementary_file.pdf]

**A Review to Focus on The Traditional Uses, Nutritive Importance, Pharmacognostical Features,  
Phytochemicals and Pharmacology of *Momordica cymbalaria* Hook F.**

**Sayeed Mohammed Firdous<sup>1\*</sup>, Dinesh Babu<sup>2</sup>, Zainab Irfan<sup>3</sup>, Marwa A.A.Fayed<sup>4\*</sup>**

<sup>1\*</sup> Department of Pharmacology, Calcutta Institute of Pharmaceutical Technology and Allied Health Sciences, Uluberia, Howrah-711316, West Bengal, India.

<sup>2</sup> Faculty of Pharmacy and Pharmaceutical Sciences, Katz Group Centre for Pharmacy and Health Research, University of Alberta, Edmonton, Alberta, T6G 2R3, Canada.

<sup>3</sup> Department of Pharmaceutical Technology, Brainware University, Kolkata-700125, West Bengal, India.

<sup>4\*</sup> Department of Pharmacognosy, Faculty of Pharmacy, University of Sadat City, Sadat City 32897, Egypt.

**\*Corresponding Authors:**

**- Sayeed Mohammed Firdous**

Associate Professor, Department of Pharmacology, Calcutta Institute of Pharmaceutical Technology and Allied Health Sciences, Uluberia, Howrah-711316, West Bengal, India

E-mail: [firdous.oncology@gmail.com](mailto:firdous.oncology@gmail.com), <https://orcid.org/0000-0002-7538-987X>

**- Marwa A.A.Fayed**

Department of Pharmacognosy, Faculty of Pharmacy, University of Sadat City, Sadat City 32897, Egypt, [marwa.fayed@fop.usc.edu.eg](mailto:marwa.fayed@fop.usc.edu.eg), <https://orcid.org/0000-0001-5609-7436>

**Table S1: Nutrients composition of *Momordica cymbalaria* and *Momordica charantia***

| Constituents (mg/100 gm) | <i>Momordica cymbalaria</i> | <i>Momordica charantia</i> |
|--------------------------|-----------------------------|----------------------------|
| Moisture                 | 84.30                       | 83.20                      |
| Fibers                   | 6.42                        | 1.70                       |
| Carbohydrate             | 12.60                       | 10.60                      |
| Protein                  | 2.15                        | 2.10                       |
| Calcium                  | 372.00                      | 23.00                      |
| Potassium                | 500.00                      | 171.00                     |
| Sodium                   | 40.00                       | 2.40                       |
| Iron                     | 1.70                        | 2.00                       |
| Copper                   | 0.18                        | 0.19                       |
| Manganese                | 0.32                        | 0.08                       |
| Zinc                     | 0.82                        | 0.46                       |
| Phosphorus               | 0.46                        | 38.00                      |
| Vitamin C                | 290.00                      | 96.00                      |
| $\beta$ -Carotene        | 0.01                        | 126.00                     |

**Table S2: Ash values of tubers of *Momordica cymbalaria***

| Parameters         | Values % (w/w) $\pm$ SD |
|--------------------|-------------------------|
| Total ash          | 3.86 $\pm$ 0.004        |
| Acid-insoluble ash | 1.26 $\pm$ 0.01         |
| Water-soluble ash  | 2.90 $\pm$ 0.002        |
| Sulfated ash       | 1.26 $\pm$ 0.014        |

**Table S3: Fundamental phytochemical screening of tubers of *Momordica cymbalaria* (C. Gopu & Taduri, 2021).**

| Phytochemicals      | Petroleum ether | Chloroform | Ethanol | Water |
|---------------------|-----------------|------------|---------|-------|
| Alkaloids           | +               | --         | +       | --    |
| Sterols             | +               | +          | --      | --    |
| Triterpenes         | +               | +          | +       | --    |
| Saponins            | --              | --         | +       | +     |
| Flavonoids          | --              | --         | +       | --    |
| Tannins             | --              | --         | --      | --    |
| Fixed oils and fats | --              | --         | --      | --    |
| Gum and mucilage    | --              | --         | --      | --    |

|                          |    |    |    |    |
|--------------------------|----|----|----|----|
| Carbohydrate             | -- | -- | +  | +  |
| Cardiac glycosides       | -- | -- | +  | +  |
| Proteins and amino acids | -- | -- | -- | -- |

+ = presence and --= absence of photochemical.
